# Supplementary material
Source: publisher figshare collection journal article supplement (https://acs.figshare.com/ndownloader/files/4091524)
Supplement: Supplementary file 1 [file 4091524]

data_publication_text
_publ_requested_journal          J.Am.Chem.Soc.
_publ_contact_author_name        'Kevin Gagnon'
_publ_contact_author_address     
;Department of Chemistry
 Texas A&M University
 College Station, TX 77840
;
_publ_contact_author_email       kgagnon@mail.chem.tamu.edu
loop_
_publ_author_name
_publ_author_address
'Gagnon, Kevin J.'
;Department of Chemistry
 Texas A&M University
 College Station, TX 77840
;
'Clearfield, Abraham'
;Department of Chemistry
 Texas A&M University
 College Station, TX 77840
;
'Beavers, Christine M.'
;Advanced Light Source
Lawrence Berkeley National Lab
Berkeley, CA 94720
;
_publ_section_acknowledgements
;
The Advanced Light Source is supported by the Director,
 Office of Science, Office of Basic Energy Sciences, of the 
U.S. Department of Energy under Contract No. DE-AC02-05CH11231.
;

data_Ambient

_audit_creation_method            SHELXL-97 
_chemical_name_systematic 
; 
 ? 
; 
_chemical_name_common             ? 
_chemical_melting_point           ? 
_chemical_formula_moiety          ? 
_chemical_formula_sum 
 'C4 H14 O8 P2 Zn' 
_chemical_formula_weight          317.46 
 
loop_ 
 _atom_type_symbol 
 _atom_type_description 
 _atom_type_scat_dispersion_real 
 _atom_type_scat_dispersion_imag 
 _atom_type_scat_source 
 'C'  'C'  -0.0020   0.0011 
 'WCROMER Program in WinGX L.Kissel & R.H.Pratt Acta Cryst A46 170 1990'
 'H'  'H'   0.0000   0.0000 
 'WCROMER Program in WinGX L.Kissel & R.H.Pratt Acta Cryst A46 170 1990'
 'O'  'O'  -0.0041   0.0043 
 'WCROMER Program in WinGX L.Kissel & R.H.Pratt Acta Cryst A46 170 1990'
 'P'  'P'   0.0660   0.0684 
 'WCROMER Program in WinGX L.Kissel & R.H.Pratt Acta Cryst A46 170 1990'
 'Zn'  'Zn'   0.3061   1.0799 
  'WCROMER Program in WinGX L.Kissel & R.H.Pratt Acta Cryst A46 170 1990'
  
_symmetry_cell_setting            monoclinic 
_symmetry_space_group_name_H-M    'C 2/c' 
 
loop_ 
 _symmetry_equiv_pos_as_xyz 
 'x, y, z' 
 '-x, y, -z+1/2' 
 'x+1/2, y+1/2, z' 
 '-x+1/2, y+1/2, -z+1/2' 
 '-x, -y, -z' 
 'x, -y, z-1/2' 
 '-x+1/2, -y+1/2, -z' 
 'x+1/2, -y+1/2, z-1/2' 
 
_cell_length_a                    18.515(4) 
_cell_length_b                    8.2910(19) 
_cell_length_c                    8.2652(19) 
_cell_angle_alpha                 90.00 
_cell_angle_beta                  113.837(2) 
_cell_angle_gamma                 90.00 
_cell_volume                      1160.5(5) 
_cell_formula_units_Z             4 
_cell_measurement_temperature     296(2) 
_cell_measurement_reflns_used     1283
_cell_measurement_theta_min       5.1365 
_cell_measurement_theta_max       24.9565 
 
_exptl_crystal_description        blade 
_exptl_crystal_colour             colorless 
_exptl_crystal_size_max           0.18 
_exptl_crystal_size_mid           0.06 
_exptl_crystal_size_min           0.04 
_exptl_crystal_density_meas       ? 
_exptl_crystal_density_diffrn     1.817 
_exptl_crystal_density_method     'not measured' 
_exptl_crystal_F_000              648 
_exptl_absorpt_coefficient_mu     1.546 
_exptl_absorpt_correction_type    multi-scan
_exptl_absorpt_correction_T_min   0.7683 
_exptl_absorpt_correction_T_max   0.9408 
_exptl_absorpt_process_details    'SADABS 2008/1 Bruker AXS Madison WI USA' 
 
_exptl_special_details 
; 
 ? 
; 
 
_diffrn_ambient_temperature       296(2) 
_diffrn_radiation_wavelength      0.60480 
_diffrn_radiation_type            synchrotron
_diffrn_radiation_source          'Advanced Light Source station 11.3.1'  
_diffrn_radiation_monochromator   'silicon 111' 
_diffrn_measurement_device_type   'Bruker APEX II CCD diffractometer' 
_diffrn_measurement_method        '\w and \f scans'
_diffrn_detector_area_resol_mean  8.3 
_diffrn_reflns_number             5105 
_diffrn_reflns_av_R_equivalents   0.0453 
_diffrn_reflns_av_sigmaI/netI     0.0403 
_diffrn_reflns_limit_h_min        -26 
_diffrn_reflns_limit_h_max        26 
_diffrn_reflns_limit_k_min        -8 
_diffrn_reflns_limit_k_max        11 
_diffrn_reflns_limit_l_min        -11 
_diffrn_reflns_limit_l_max        11 
_diffrn_reflns_theta_min          5.14 
_diffrn_reflns_theta_max          25.69 
_reflns_number_total              1770 
_reflns_number_gt                 1443 
_reflns_threshold_expression      >2sigma(I) 
 
_computing_data_collection        'Bruker APEX 2' 
_computing_cell_refinement        'Bruker SAINT v7.60a' 
_computing_data_reduction         'Bruker SAINT v7.60a' 
_computing_structure_solution     'Bruker SHELXTL' 
_computing_structure_refinement   'Bruker SHELXTL' 
_computing_molecular_graphics     'Bruker SHELXTL' 
_computing_publication_material   'Bruker SHELXTL & local programs'
 
_refine_special_details 
; 
 Refinement of F^2^ against ALL reflections.  The weighted R-factor wR and 
 goodness of fit S are based on F^2^, conventional R-factors R are based 
 on F, with F set to zero for negative F^2^. The threshold expression of 
 F^2^ > 2sigma(F^2^) is used only for calculating R-factors(gt) etc. and is 
 not relevant to the choice of reflections for refinement.  R-factors based 
 on F^2^ are statistically about twice as large as those based on F, and R- 
 factors based on ALL data will be even larger. All non-hydrogen atoms were
 refined anisotropically. Hydrogen atoms were place geometrically on the 
 carbon atoms and refined with a riding model. The Hydrogen atoms on the
 oxygen atoms were found in the difference map, their distances were 
 restrained at 0.85(1) for water and 0.82(2) for hydroxide and their 
 displacement parameters were riden on their respective oxygen.
; 
 
_refine_ls_structure_factor_coef  Fsqd  
_refine_ls_matrix_type            full 
_refine_ls_weighting_scheme       calc  
_refine_ls_weighting_details 
 'calc w=1/[\s^2^(Fo^2^)+(0.0515P)^2^+0.0000P] where P=(Fo^2^+2Fc^2^)/3' 
_atom_sites_solution_primary      direct 
_atom_sites_solution_secondary    difmap 
_atom_sites_solution_hydrogens    geom 
_refine_ls_hydrogen_treatment     constr 
_refine_ls_extinction_method      none 
_refine_ls_extinction_coef        ? 
_refine_ls_number_reflns          1770 
_refine_ls_number_parameters      69 
_refine_ls_number_restraints      0 
_refine_ls_R_factor_all           0.0458 
_refine_ls_R_factor_gt            0.0370 
_refine_ls_wR_factor_ref          0.0960 
_refine_ls_wR_factor_gt           0.0917 
_refine_ls_goodness_of_fit_ref    1.041 
_refine_ls_restrained_S_all       1.041 
_refine_ls_shift/su_max           0.000 
_refine_ls_shift/su_mean          0.000 
 
loop_ 
 _atom_site_label 
 _atom_site_type_symbol 
 _atom_site_fract_x 
 _atom_site_fract_y 
 _atom_site_fract_z 
 _atom_site_U_iso_or_equiv 
 _atom_site_adp_type 
 _atom_site_occupancy 
 _atom_site_symmetry_multiplicity 
 _atom_site_calc_flag 
 _atom_site_refinement_flags 
 _atom_site_disorder_assembly 
 _atom_site_disorder_group 
Zn1 Zn 0.5000 0.55847(5) 0.7500 0.02614(14) Uani 1 2 d S . . 
P1 P 0.39872(4) 0.31270(8) 0.85968(7) 0.02871(17) Uani 1 1 d . . . 
O1 O 0.41034(11) 0.4332(2) 0.7372(2) 0.0380(4) Uani 1 1 d . . . 
O1W O 0.40430(15) -0.1177(3) 0.9419(3) 0.0519(6) Uani 1 1 d . . . 
H2W H 0.4419 -0.1758 0.9563 0.078 Uiso 1 1 d R . . 
H1W H 0.4030 -0.1397 1.0400 0.078 Uiso 1 1 d R . . 
O2 O 0.46522(10) 0.3043(2) 1.0420(2) 0.0324(4) Uani 1 1 d . . . 
O3 O 0.39145(13) 0.1443(3) 0.7693(2) 0.0413(5) Uani 1 1 d . . . 
H3 H 0.4057 0.0737 0.8451 0.062 Uiso 1 1 calc R . . 
C1 C 0.30746(15) 0.3512(4) 0.8759(3) 0.0352(6) Uani 1 1 d . . . 
H1A H 0.3090 0.4587 0.9237 0.042 Uiso 1 1 calc R . . 
H1B H 0.2654 0.3493 0.7581 0.042 Uiso 1 1 calc R . . 
C2 C 0.28819(16) 0.2303(4) 0.9920(4) 0.0398(6) Uani 1 1 d . . . 
H2A H 0.2845 0.1232 0.9421 0.048 Uiso 1 1 calc R . . 
H2B H 0.3308 0.2296 1.1090 0.048 Uiso 1 1 calc R . . 
 
loop_ 
 _atom_site_aniso_label 
 _atom_site_aniso_U_11 
 _atom_site_aniso_U_22 
 _atom_site_aniso_U_33 
 _atom_site_aniso_U_23 
 _atom_site_aniso_U_13 
 _atom_site_aniso_U_12 
Zn1 0.0293(2) 0.0322(2) 0.02374(19) 0.000 0.01776(15) 0.000 
P1 0.0302(3) 0.0363(4) 0.0257(3) -0.0010(2) 0.0176(2) -0.0047(2) 
O1 0.0355(10) 0.0504(13) 0.0332(9) 0.0080(8) 0.0191(8) -0.0076(8) 
O1W 0.0653(14) 0.0550(14) 0.0449(11) 0.0106(10) 0.0322(10) 0.0168(11) 
O2 0.0332(9) 0.0396(11) 0.0278(8) -0.0052(7) 0.0156(7) 0.0009(7) 
O3 0.0589(13) 0.0403(12) 0.0315(8) -0.0065(8) 0.0254(9) -0.0080(9) 
C1 0.0323(12) 0.0444(16) 0.0361(12) 0.0041(10) 0.0212(10) -0.0033(11) 
C2 0.0336(13) 0.0521(18) 0.0436(13) 0.0088(12) 0.0260(11) 0.0010(12) 
 
_geom_special_details 
; 
 All esds (except the esd in the dihedral angle between two l.s. planes) 
 are estimated using the full covariance matrix.  The cell esds are taken 
 into account individually in the estimation of esds in distances, angles 
 and torsion angles; correlations between esds in cell parameters are only 
 used when they are defined by crystal symmetry.  An approximate (isotropic) 
 treatment of cell esds is used for estimating esds involving l.s. planes. 
; 
 
loop_ 
 _geom_bond_atom_site_label_1 
 _geom_bond_atom_site_label_2 
 _geom_bond_distance 
 _geom_bond_site_symmetry_2 
 _geom_bond_publ_flag 
Zn1 O1 1.9247(18) 2_656 ? 
Zn1 O1 1.9247(18) . ? 
Zn1 O2 1.9412(17) 5_667 ? 
Zn1 O2 1.9412(17) 6_565 ? 
P1 O1 1.4981(18) . ? 
P1 O2 1.5141(18) . ? 
P1 O3 1.563(2) . ? 
P1 C1 1.777(3) . ? 
O1W H2W 0.8145 . ? 
O1W H1W 0.8417 . ? 
O2 Zn1 1.9412(17) 5_667 ? 
O3 H3 0.8200 . ? 
C1 C2 1.527(3) . ? 
C1 H1A 0.9700 . ? 
C1 H1B 0.9700 . ? 
C2 C2 1.508(5) 7_557 ? 
C2 H2A 0.9700 . ? 
C2 H2B 0.9700 . ? 
 
loop_ 
 _geom_angle_atom_site_label_1 
 _geom_angle_atom_site_label_2 
 _geom_angle_atom_site_label_3 
 _geom_angle 
 _geom_angle_site_symmetry_1 
 _geom_angle_site_symmetry_3 
 _geom_angle_publ_flag 
O1 Zn1 O1 114.68(13) 2_656 . ? 
O1 Zn1 O2 107.31(7) 2_656 5_667 ? 
O1 Zn1 O2 109.56(7) . 5_667 ? 
O1 Zn1 O2 109.56(7) 2_656 6_565 ? 
O1 Zn1 O2 107.31(7) . 6_565 ? 
O2 Zn1 O2 108.27(11) 5_667 6_565 ? 
O1 P1 O2 114.95(11) . . ? 
O1 P1 O3 106.30(11) . . ? 
O2 P1 O3 108.25(11) . . ? 
O1 P1 C1 109.36(12) . . ? 
O2 P1 C1 110.41(11) . . ? 
O3 P1 C1 107.21(13) . . ? 
P1 O1 Zn1 132.77(12) . . ? 
H2W O1W H1W 94.9 . . ? 
P1 O2 Zn1 134.42(12) . 5_667 ? 
P1 O3 H3 109.5 . . ? 
C2 C1 P1 113.6(2) . . ? 
C2 C1 H1A 108.8 . . ? 
P1 C1 H1A 108.8 . . ? 
C2 C1 H1B 108.8 . . ? 
P1 C1 H1B 108.8 . . ? 
H1A C1 H1B 107.7 . . ? 
C2 C2 C1 112.2(3) 7_557 . ? 
C2 C2 H2A 109.2 7_557 . ? 
C1 C2 H2A 109.2 . . ? 
C2 C2 H2B 109.2 7_557 . ? 
C1 C2 H2B 109.2 . . ? 
H2A C2 H2B 107.9 . . ? 
 
loop_ 
 _geom_hbond_atom_site_label_D 
 _geom_hbond_atom_site_label_H 
 _geom_hbond_atom_site_label_A 
 _geom_hbond_distance_DH 
 _geom_hbond_distance_HA 
 _geom_hbond_distance_DA 
 _geom_hbond_angle_DHA 
 _geom_hbond_site_symmetry_A 
O1W H2W O2  0.81 2.02 2.826(3) 171.2 5_657 
O1W H1W O3  0.84 1.99 2.819(3) 167.9 6_556 
O3 H3 O1W  0.82 1.78 2.557(3) 157.1 . 
 
_diffrn_measured_fraction_theta_max    0.989 
_diffrn_reflns_theta_full              25.69 
_diffrn_measured_fraction_theta_full   0.989 
_refine_diff_density_max    0.490 
_refine_diff_density_min   -0.817 
_refine_diff_density_rms    0.091 

data_1_65GPa 
  
_audit_creation_method            SHELXL-97 
_chemical_name_systematic 
; 
 ? 
; 
_chemical_name_common             ? 
_chemical_melting_point           ? 
_chemical_formula_moiety          ? 
_chemical_formula_sum 
 'C4 H14 O8 P2 Zn' 
_chemical_formula_weight          317.46 
  
loop_ 
 _atom_type_symbol 
 _atom_type_description 
 _atom_type_scat_dispersion_real 
 _atom_type_scat_dispersion_imag 
 _atom_type_scat_source 
 'C'  'C'  -0.0020   0.0011 
 'WCROMER Program in WinGX L.Kissel & R.H.Pratt Acta Cryst A46 170 1990'
 'H'  'H'   0.0000   0.0000 
 'WCROMER Program in WinGX L.Kissel & R.H.Pratt Acta Cryst A46 170 1990'
 'O'  'O'  -0.0041   0.0043 
 'WCROMER Program in WinGX L.Kissel & R.H.Pratt Acta Cryst A46 170 1990'
 'P'  'P'   0.0660   0.0684 
 'WCROMER Program in WinGX L.Kissel & R.H.Pratt Acta Cryst A46 170 1990'
 'Zn'  'Zn'   0.3061   1.0799 
  'WCROMER Program in WinGX L.Kissel & R.H.Pratt Acta Cryst A46 170 1990'
  
_symmetry_cell_setting            monoclinic 
_symmetry_space_group_name_H-M    'C 2/c' 
  
loop_ 
 _symmetry_equiv_pos_as_xyz 
 'x, y, z' 
 '-x, y, -z+1/2' 
 'x+1/2, y+1/2, z' 
 '-x+1/2, y+1/2, -z+1/2' 
 '-x, -y, -z' 
 'x, -y, z-1/2' 
 '-x+1/2, -y+1/2, -z' 
 'x+1/2, -y+1/2, z-1/2' 
  
_cell_length_a                    17.9912(19) 
_cell_length_b                    8.000(2) 
_cell_length_c                    8.0643(6) 
_cell_angle_alpha                 90.00 
_cell_angle_beta                  117.609(6) 
_cell_angle_gamma                 90.00 
_cell_volume                      1028.5(3) 
_cell_formula_units_Z             4 
_cell_measurement_temperature     296(2) 
_cell_measurement_reflns_used     2665 
_cell_measurement_theta_min       3.7235 
_cell_measurement_theta_max       25.6415 
  
_exptl_crystal_description        blade 
_exptl_crystal_colour             colorless 
_exptl_crystal_size_max           0.18 
_exptl_crystal_size_mid           0.06 
_exptl_crystal_size_min           0.04 
_exptl_crystal_density_meas       ? 
_exptl_crystal_density_diffrn     2.050 
_exptl_crystal_density_method     'not measured' 
_exptl_crystal_F_000              648 
_exptl_absorpt_coefficient_mu     1.744 
_exptl_absorpt_correction_type    multi-scan 
_exptl_absorpt_correction_T_min   0.7443 
_exptl_absorpt_correction_T_max   0.9335 
_exptl_absorpt_process_details    'SADABS 2008/1 Bruker AXS Madison WI USA' 
  
_exptl_special_details 
; 
 The sample crystal was loaded into a Merill-Bassett-type cell,
 equipped with Bohler-Almax cut diamonds set in tungsten carbide
 backing seats, impinging upon a tungsten gasket.
; 
  
_diffrn_ambient_temperature       296(2) 
_diffrn_radiation_wavelength      0.60480 
_diffrn_radiation_type            synchrotron 
_diffrn_radiation_source          'Advanced Light Source station 11.3.1' 
_diffrn_radiation_monochromator   'silicon 111' 
_diffrn_measurement_device_type   'Bruker APEX II CCD diffractometer' 
_diffrn_measurement_method        '\w and \f scans' 
_diffrn_detector_area_resol_mean  8.3 
_diffrn_reflns_number             6682 
_diffrn_reflns_av_R_equivalents   0.0439 
_diffrn_reflns_av_sigmaI/netI     0.0308 
_diffrn_reflns_limit_h_min        -25 
_diffrn_reflns_limit_h_max        25 
_diffrn_reflns_limit_k_min        -5 
_diffrn_reflns_limit_k_max        5 
_diffrn_reflns_limit_l_min        -11 
_diffrn_reflns_limit_l_max        11 
_diffrn_reflns_theta_min          3.77 
_diffrn_reflns_theta_max          25.20 
_reflns_number_total              762 
_reflns_number_gt                 661 
_reflns_threshold_expression    I>2\s(I) 
  
_computing_data_collection        'Bruker APEX 2' 
_computing_cell_refinement        'Bruker SAINT v7.60a' 
_computing_data_reduction         'Bruker SAINT v7.60a' 
_computing_structure_solution     'Bruker SHELXTL' 
_computing_structure_refinement   'Bruker SHELXTL' 
_computing_molecular_graphics     'Bruker SHELXTL' 
_computing_publication_material   'Bruker SHELXTL & local programs' 
  
_refine_special_details 
; 
 Refinement of F^2^ against ALL reflections.  The weighted R-factor wR and 
 goodness of fit S are based on F^2^, conventional R-factors R are based 
 on F, with F set to zero for negative F^2^. The threshold expression of 
 F^2^ > 2sigma(F^2^) is used only for calculating R-factors(gt) etc. and is 
 not relevant to the choice of reflections for refinement.  R-factors based 
 on F^2^ are statistically about twice as large as those based on F, and R- 
 factors based on ALL data will be even larger. All non-hydrogen atoms were 
 refined anisotropically, except for O1 which was treated isotropically.
 This was done due to suspected missing or obscured reflections causing
 an NPD. This is due to the limited data from DAC data collection. 
 Hydrogen atoms were placed geometrically on the carbon atoms and refined
 with a riding model. The Hydrogen atoms on the oxygen atoms were found 
 in the difference map, their distances were restrained at 0.85(1) for water 
 and 0.82(2) for hydroxide and their displacement parameters were riden 
 on their respective oxygen.
; 
  
_refine_ls_structure_factor_coef  Fsqd 
_refine_ls_matrix_type            full 
_refine_ls_weighting_scheme       calc 
_refine_ls_weighting_details 
 'calc w=1/[\s^2^(Fo^2^)+(0.0285P)^2^+6.0838P] where P=(Fo^2^+2Fc^2^)/3' 
_atom_sites_solution_primary      direct 
_atom_sites_solution_secondary    difmap 
_atom_sites_solution_hydrogens    geom 
_refine_ls_hydrogen_treatment     constr 
_refine_ls_extinction_method      none 
_refine_ls_extinction_coef        ? 
_refine_ls_number_reflns          762 
_refine_ls_number_parameters      64 
_refine_ls_number_restraints      0 
_refine_ls_R_factor_all           0.0450 
_refine_ls_R_factor_gt            0.0344 
_refine_ls_wR_factor_ref          0.0964 
_refine_ls_wR_factor_gt           0.0789 
_refine_ls_goodness_of_fit_ref    1.198 
_refine_ls_restrained_S_all       1.198 
_refine_ls_shift/su_max           0.000 
_refine_ls_shift/su_mean          0.000 
  
loop_ 
 _atom_site_label 
 _atom_site_type_symbol 
 _atom_site_fract_x 
 _atom_site_fract_y 
 _atom_site_fract_z 
 _atom_site_U_iso_or_equiv 
 _atom_site_adp_type 
 _atom_site_occupancy 
 _atom_site_symmetry_multiplicity 
 _atom_site_calc_flag 
 _atom_site_refinement_flags 
 _atom_site_disorder_assembly 
 _atom_site_disorder_group 
Zn1 Zn 0.5000 0.55556(18) 0.7500 0.0276(5) Uani 1 2 d S . . 
P1 P 0.39200(6) 0.3094(3) 0.83826(14) 0.0260(7) Uani 1 1 d . . . 
O1 O 0.40194(17) 0.4333(8) 0.7100(4) 0.0296(7) Uiso 1 1 d . . . 
O2 O 0.46560(17) 0.3052(8) 1.0327(4) 0.035(2) Uani 1 1 d . . . 
O3 O 0.3835(2) 0.1334(9) 0.7489(5) 0.037(2) Uani 1 1 d . . . 
H3 H 0.3927 0.0613 0.8284 0.056 Uiso 1 1 calc R . . 
C2 C 0.2884(3) 0.2297(11) 0.9884(6) 0.029(3) Uani 1 1 d . . . 
H2A H 0.2840 0.1161 0.9429 0.035 Uiso 1 1 calc R . . 
H2B H 0.3379 0.2364 1.1093 0.035 Uiso 1 1 calc R . . 
C1 C 0.2983(2) 0.3488(11) 0.8525(6) 0.025(3) Uani 1 1 d . . . 
H1A H 0.2988 0.4630 0.8933 0.030 Uiso 1 1 calc R . . 
H1B H 0.2508 0.3364 0.7294 0.030 Uiso 1 1 calc R . . 
O1W O 0.4057(2) -0.1185(9) 0.9412(5) 0.049(3) Uani 1 1 d . . . 
H1W H 0.4064 -0.1079 1.0467 0.073 Uiso 1 1 d R . . 
H2W H 0.4541 -0.1602 0.9745 0.073 Uiso 1 1 d R . . 
  
loop_ 
 _atom_site_aniso_label 
 _atom_site_aniso_U_11 
 _atom_site_aniso_U_22 
 _atom_site_aniso_U_33 
 _atom_site_aniso_U_23 
 _atom_site_aniso_U_13 
 _atom_site_aniso_U_12 
Zn1 0.0237(3) 0.0406(15) 0.0226(3) 0.000 0.0144(2) 0.000 
P1 0.0254(5) 0.032(2) 0.0245(5) -0.0010(7) 0.0147(4) -0.0031(6) 
O2 0.0244(13) 0.054(7) 0.0261(13) -0.003(2) 0.0108(11) 0.0034(17) 
O3 0.054(2) 0.031(8) 0.0347(16) -0.007(2) 0.0274(15) -0.003(2) 
C2 0.030(2) 0.023(9) 0.042(2) 0.007(3) 0.0234(17) 0.002(2) 
C1 0.0289(19) 0.015(9) 0.0341(19) 0.007(3) 0.0182(16) 0.005(2) 
O1W 0.046(2) 0.068(9) 0.0393(17) 0.008(3) 0.0264(15) 0.015(2) 
  
_geom_special_details 
; 
 All esds (except the esd in the dihedral angle between two l.s. planes) 
 are estimated using the full covariance matrix.  The cell esds are taken 
 into account individually in the estimation of esds in distances, angles 
 and torsion angles; correlations between esds in cell parameters are only 
 used when they are defined by crystal symmetry.  An approximate (isotropic) 
 treatment of cell esds is used for estimating esds involving l.s. planes. 
; 
  
loop_ 
 _geom_bond_atom_site_label_1 
 _geom_bond_atom_site_label_2 
 _geom_bond_distance 
 _geom_bond_site_symmetry_2 
 _geom_bond_publ_flag 
Zn1 O1 1.909(4) . ? 
Zn1 O1 1.909(4) 2_656 ? 
Zn1 O2 1.921(5) 5_667 ? 
Zn1 O2 1.921(5) 6_565 ? 
P1 O1 1.502(5) . ? 
P1 O2 1.513(3) . ? 
P1 O3 1.557(7) . ? 
P1 C1 1.770(4) . ? 
O2 Zn1 1.921(5) 5_667 ? 
O3 H3 0.8200 . ? 
C2 C2 1.512(8) 7_557 ? 
C2 C1 1.524(9) . ? 
C2 H2A 0.9700 . ? 
C2 H2B 0.9700 . ? 
C1 H1A 0.9700 . ? 
C1 H1B 0.9700 . ? 
O1W H1W 0.8499 . ? 
O1W H2W 0.8500 . ? 
  
loop_ 
 _geom_angle_atom_site_label_1 
 _geom_angle_atom_site_label_2 
 _geom_angle_atom_site_label_3 
 _geom_angle 
 _geom_angle_site_symmetry_1 
 _geom_angle_site_symmetry_3 
 _geom_angle_publ_flag 
O1 Zn1 O1 118.4(3) . 2_656 ? 
O1 Zn1 O2 109.47(15) . 5_667 ? 
O1 Zn1 O2 105.12(15) 2_656 5_667 ? 
O1 Zn1 O2 105.12(15) . 6_565 ? 
O1 Zn1 O2 109.47(15) 2_656 6_565 ? 
O2 Zn1 O2 109.1(3) 5_667 6_565 ? 
O1 P1 O2 113.7(2) . . ? 
O1 P1 O3 107.2(3) . . ? 
O2 P1 O3 108.1(3) . . ? 
O1 P1 C1 110.4(3) . . ? 
O2 P1 C1 109.81(19) . . ? 
O3 P1 C1 107.4(3) . . ? 
P1 O1 Zn1 128.10(19) . . ? 
P1 O2 Zn1 133.6(3) . 5_667 ? 
P1 O3 H3 109.5 . . ? 
C2 C2 C1 111.9(7) 7_557 . ? 
C2 C2 H2A 109.2 7_557 . ? 
C1 C2 H2A 109.2 . . ? 
C2 C2 H2B 109.2 7_557 . ? 
C1 C2 H2B 109.2 . . ? 
H2A C2 H2B 107.9 . . ? 
C2 C1 P1 111.6(4) . . ? 
C2 C1 H1A 109.3 . . ? 
P1 C1 H1A 109.3 . . ? 
C2 C1 H1B 109.3 . . ? 
P1 C1 H1B 109.3 . . ? 
H1A C1 H1B 108.0 . . ? 
H1W O1W H2W 100.7 . . ? 
  
loop_ 
 _geom_hbond_atom_site_label_D 
 _geom_hbond_atom_site_label_H 
 _geom_hbond_atom_site_label_A 
 _geom_hbond_distance_DH 
 _geom_hbond_distance_HA 
 _geom_hbond_distance_DA 
 _geom_hbond_angle_DHA 
 _geom_hbond_site_symmetry_A 
O3 H3 O1W  0.82 1.66 2.460(9) 164.6 . 
O1W H1W O3  0.85 1.87 2.693(4) 163.0 6_556 
O1W H2W O2  0.85 1.88 2.680(6) 157.4 5_657 
  
_diffrn_measured_fraction_theta_max    0.507 
_diffrn_reflns_theta_full              25.20 
_diffrn_measured_fraction_theta_full   0.507 
_refine_diff_density_max    0.415 
_refine_diff_density_min   -0.434 
_refine_diff_density_rms    0.103 
 
data_2_81GPa 
  
_audit_creation_method            SHELXL-97 
_chemical_name_systematic 
; 
 ? 
; 
_chemical_name_common             ? 
_chemical_melting_point           ? 
_chemical_formula_moiety          ? 
_chemical_formula_sum 
 'C4 H14 O8 P2 Zn' 
_chemical_formula_weight          317.46 
  
loop_ 
 _atom_type_symbol 
 _atom_type_description 
 _atom_type_scat_dispersion_real 
 _atom_type_scat_dispersion_imag 
 _atom_type_scat_source 
 'C'  'C'  -0.0020   0.0011 
 'WCROMER Program in WinGX L.Kissel & R.H.Pratt Acta Cryst A46 170 1990'
 'H'  'H'   0.0000   0.0000 
 'WCROMER Program in WinGX L.Kissel & R.H.Pratt Acta Cryst A46 170 1990'
 'O'  'O'  -0.0041   0.0043 
 'WCROMER Program in WinGX L.Kissel & R.H.Pratt Acta Cryst A46 170 1990'
 'P'  'P'   0.0660   0.0684 
 'WCROMER Program in WinGX L.Kissel & R.H.Pratt Acta Cryst A46 170 1990'
 'Zn'  'Zn'   0.3061   1.0799 
  'WCROMER Program in WinGX L.Kissel & R.H.Pratt Acta Cryst A46 170 1990'
  
_symmetry_cell_setting            monoclinic 
_symmetry_space_group_name_H-M    'C 2/c' 
  
loop_ 
 _symmetry_equiv_pos_as_xyz 
 'x, y, z' 
 '-x, y, -z+1/2' 
 'x+1/2, y+1/2, z' 
 '-x+1/2, y+1/2, -z+1/2' 
 '-x, -y, -z' 
 'x, -y, z-1/2' 
 '-x+1/2, -y+1/2, -z' 
 'x+1/2, -y+1/2, z-1/2' 
  
_cell_length_a                    17.685(2) 
_cell_length_b                    8.147(2) 
_cell_length_c                    7.7557(6) 
_cell_angle_alpha                 90.00 
_cell_angle_beta                  119.697(6) 
_cell_angle_gamma                 90.00 
_cell_volume                      970.6(3) 
_cell_formula_units_Z             4 
_cell_measurement_temperature     296(2) 
_cell_measurement_reflns_used     1977 
_cell_measurement_theta_min       3.738 
_cell_measurement_theta_max       25.3725 
  
_exptl_crystal_description        'blade' 
_exptl_crystal_colour             'colorless' 
_exptl_crystal_size_max           0.18 
_exptl_crystal_size_mid           0.06 
_exptl_crystal_size_min           0.04 
_exptl_crystal_density_meas       ? 
_exptl_crystal_density_diffrn     2.172 
_exptl_crystal_density_method     'not measured' 
_exptl_crystal_F_000              648 
_exptl_absorpt_coefficient_mu     1.848 
_exptl_absorpt_correction_type    multi-scan 
_exptl_absorpt_correction_T_min   0.7321 
_exptl_absorpt_correction_T_max   0.9297 
_exptl_absorpt_process_details     'SADABS 2008/1 Bruker AXS Madison WI USA' 
  
_exptl_special_details 
; 
  The sample crystal was loaded into a Merill-Bassett-type cell,
 equipped with Bohler-Almax cut diamonds set in tungsten carbide
 backing seats, impinging upon a tungsten gasket.
; 
  
_diffrn_ambient_temperature       296(2) 
_diffrn_radiation_wavelength      0.60480 
_diffrn_radiation_type            synchrotron 
_diffrn_radiation_source          'Advanced Light Source station 11.3.1' 
_diffrn_radiation_monochromator   'silicon 111' 
_diffrn_measurement_device_type   'Bruker APEX II CCD diffractometer' 
_diffrn_measurement_method        '\w and \f scans'
_diffrn_detector_area_resol_mean  8.3 
_diffrn_reflns_number             10263 
_diffrn_reflns_av_R_equivalents   0.0537 
_diffrn_reflns_av_sigmaI/netI     0.0255 
_diffrn_reflns_limit_h_min        -24 
_diffrn_reflns_limit_h_max        24 
_diffrn_reflns_limit_k_min        -5 
_diffrn_reflns_limit_k_max        6 
_diffrn_reflns_limit_l_min        -10 
_diffrn_reflns_limit_l_max        10 
_diffrn_reflns_theta_min          3.74 
_diffrn_reflns_theta_max          24.83 
_reflns_number_total              721 
_reflns_number_gt                 638 
_reflns_threshold_expression     I>2\s(I) 
  
_computing_data_collection        'Bruker APEX 2' 
_computing_cell_refinement        'Bruker SAINT v7.60a' 
_computing_data_reduction         'Bruker SAINT v7.60a' 
_computing_structure_solution     'Bruker SHELXTL' 
_computing_structure_refinement   'Bruker SHELXTL' 
_computing_molecular_graphics     'Bruker SHELXTL' 
_computing_publication_material   'Bruker SHELXTL & local programs' 
  
_refine_special_details 
; 
 Refinement of F^2^ against ALL reflections.  The weighted R-factor wR and 
 goodness of fit S are based on F^2^, conventional R-factors R are based 
 on F, with F set to zero for negative F^2^. The threshold expression of 
 F^2^ > 2sigma(F^2^) is used only for calculating R-factors(gt) etc. and is 
 not relevant to the choice of reflections for refinement.  R-factors based 
 on F^2^ are statistically about twice as large as those based on F, and R- 
 factors based on ALL data will be even larger. All non-hydrogen atoms were 
 refined anisotropically, except for O2 which was treated isotropically.
 This was done due to suspected missing or obscured reflections causing
 an NPD. This is due to the limited data from DAC data collection. 
 Hydrogen atoms were place geometrically on the carbon atoms and refined
 with a riding model. The Hydrogen atoms on the oxygen atoms were found 
 in the difference map, their distances were restrained at 0.85(1) for water 
 and 0.82(2) for hydroxide and their displacement parameters were riden 
 on their respective oxygen.
; 
  
_refine_ls_structure_factor_coef  Fsqd 
_refine_ls_matrix_type            full 
_refine_ls_weighting_scheme       calc 
_refine_ls_weighting_details 
 'calc w=1/[\s^2^(Fo^2^)+(0.0452P)^2^+5.9255P] where P=(Fo^2^+2Fc^2^)/3' 
_atom_sites_solution_primary      direct 
_atom_sites_solution_secondary    difmap 
_atom_sites_solution_hydrogens    geom 
_refine_ls_hydrogen_treatment     constr 
_refine_ls_extinction_method      none 
_refine_ls_extinction_coef        ? 
_refine_ls_number_reflns          721 
_refine_ls_number_parameters      64 
_refine_ls_number_restraints      2 
_refine_ls_R_factor_all           0.0453 
_refine_ls_R_factor_gt            0.0345 
_refine_ls_wR_factor_ref          0.1131 
_refine_ls_wR_factor_gt           0.0867 
_refine_ls_goodness_of_fit_ref    1.215 
_refine_ls_restrained_S_all       1.213 
_refine_ls_shift/su_max           0.000 
_refine_ls_shift/su_mean          0.000 
  
loop_ 
 _atom_site_label 
 _atom_site_type_symbol 
 _atom_site_fract_x 
 _atom_site_fract_y 
 _atom_site_fract_z 
 _atom_site_U_iso_or_equiv 
 _atom_site_adp_type 
 _atom_site_occupancy 
 _atom_site_symmetry_multiplicity 
 _atom_site_calc_flag 
 _atom_site_refinement_flags 
 _atom_site_disorder_assembly 
 _atom_site_disorder_group 
Zn1 Zn 0.5000 0.54884(18) 0.7500 0.0267(5) Uani 1 2 d S . . 
P1 P 0.38739(7) 0.3078(3) 0.81909(16) 0.0301(8) Uani 1 1 d . . . 
O1 O 0.3960(2) 0.4271(9) 0.6837(5) 0.037(2) Uani 1 1 d . . . 
O1W O 0.4143(3) -0.1000(12) 0.9447(6) 0.066(3) Uani 1 1 d D . . 
H1W H 0.3928 -0.0808 1.0193 0.099 Uiso 1 1 d RD . . 
H2W H 0.4591 -0.1515 0.9605 0.099 Uiso 1 1 d RD . . 
O2 O 0.46619(19) 0.3051(8) 1.0268(5) 0.0273(7) Uiso 1 1 d . . . 
O3 O 0.3783(3) 0.1339(10) 0.7290(5) 0.032(2) Uani 1 1 d . . . 
H3 H 0.3921 0.0648 0.8164 0.049 Uiso 1 1 calc R . . 
C1 C 0.2917(3) 0.3399(12) 0.8315(7) 0.035(3) Uani 1 1 d . . . 
H1A H 0.2887 0.4541 0.8629 0.042 Uiso 1 1 calc R . . 
H1B H 0.2415 0.3169 0.7028 0.042 Uiso 1 1 calc R . . 
C2 C 0.2885(3) 0.2315(13) 0.9872(8) 0.046(3) Uani 1 1 d . . . 
H2A H 0.2860 0.1174 0.9490 0.055 Uiso 1 1 calc R . . 
H2B H 0.3415 0.2469 1.1132 0.055 Uiso 1 1 calc R . . 
  
loop_ 
 _atom_site_aniso_label 
 _atom_site_aniso_U_11 
 _atom_site_aniso_U_22 
 _atom_site_aniso_U_33 
 _atom_site_aniso_U_23 
 _atom_site_aniso_U_13 
 _atom_site_aniso_U_12 
Zn1 0.0252(4) 0.0350(16) 0.0241(3) 0.000 0.0153(3) 0.000 
P1 0.0249(5) 0.044(2) 0.0250(5) -0.0008(7) 0.0151(4) -0.0031(6) 
O1 0.0309(16) 0.049(8) 0.0332(16) 0.000(2) 0.0178(13) 0.0002(19) 
O1W 0.045(2) 0.115(10) 0.049(2) 0.013(3) 0.0324(19) 0.019(3) 
O3 0.057(2) 0.012(8) 0.0335(17) -0.004(2) 0.0268(16) -0.004(2) 
C1 0.026(2) 0.050(10) 0.033(2) 0.001(3) 0.0171(17) 0.003(2) 
C2 0.032(2) 0.072(11) 0.041(2) 0.001(4) 0.025(2) 0.004(3) 
  
_geom_special_details 
; 
 All esds (except the esd in the dihedral angle between two l.s. planes) 
 are estimated using the full covariance matrix.  The cell esds are taken 
 into account individually in the estimation of esds in distances, angles 
 and torsion angles; correlations between esds in cell parameters are only 
 used when they are defined by crystal symmetry.  An approximate (isotropic) 
 treatment of cell esds is used for estimating esds involving l.s. planes. 
; 
  
loop_ 
 _geom_bond_atom_site_label_1 
 _geom_bond_atom_site_label_2 
 _geom_bond_distance 
 _geom_bond_site_symmetry_2 
 _geom_bond_publ_flag 
Zn1 O1 1.921(5) 2_656 ? 
Zn1 O1 1.921(5) . ? 
Zn1 O2 1.935(5) 5_667 ? 
Zn1 O2 1.935(5) 6_565 ? 
P1 O1 1.493(6) . ? 
P1 O2 1.521(3) . ? 
P1 O3 1.552(8) . ? 
P1 C1 1.761(5) . ? 
O1W H1W 0.8499 . ? 
O1W H2W 0.8500 . ? 
O2 Zn1 1.935(5) 5_667 ? 
O3 H3 0.8200 . ? 
C1 C2 1.520(10) . ? 
C1 H1A 0.9700 . ? 
C1 H1B 0.9700 . ? 
C2 C2 1.501(9) 7_557 ? 
C2 H2A 0.9700 . ? 
C2 H2B 0.9700 . ? 
  
loop_ 
 _geom_angle_atom_site_label_1 
 _geom_angle_atom_site_label_2 
 _geom_angle_atom_site_label_3 
 _geom_angle 
 _geom_angle_site_symmetry_1 
 _geom_angle_site_symmetry_3 
 _geom_angle_publ_flag 
O1 Zn1 O1 117.9(4) 2_656 . ? 
O1 Zn1 O2 104.32(17) 2_656 5_667 ? 
O1 Zn1 O2 112.80(16) . 5_667 ? 
O1 Zn1 O2 112.80(16) 2_656 6_565 ? 
O1 Zn1 O2 104.32(17) . 6_565 ? 
O2 Zn1 O2 104.1(3) 5_667 6_565 ? 
O1 P1 O2 113.3(3) . . ? 
O1 P1 O3 107.6(3) . . ? 
O2 P1 O3 107.4(3) . . ? 
O1 P1 C1 112.2(3) . . ? 
O2 P1 C1 110.2(2) . . ? 
O3 P1 C1 105.8(4) . . ? 
P1 O1 Zn1 124.4(2) . . ? 
H1W O1W H2W 133.9 . . ? 
P1 O2 Zn1 130.8(3) . 5_667 ? 
P1 O3 H3 109.5 . . ? 
C2 C1 P1 111.9(5) . . ? 
C2 C1 H1A 109.2 . . ? 
P1 C1 H1A 109.2 . . ? 
C2 C1 H1B 109.2 . . ? 
P1 C1 H1B 109.2 . . ? 
H1A C1 H1B 107.9 . . ? 
C2 C2 C1 112.4(9) 7_557 . ? 
C2 C2 H2A 109.1 7_557 . ? 
C1 C2 H2A 109.1 . . ? 
C2 C2 H2B 109.1 7_557 . ? 
C1 C2 H2B 109.1 . . ? 
H2A C2 H2B 107.8 . . ? 
  
loop_ 
 _geom_hbond_atom_site_label_D 
 _geom_hbond_atom_site_label_H 
 _geom_hbond_atom_site_label_A 
 _geom_hbond_distance_DH 
 _geom_hbond_distance_HA 
 _geom_hbond_distance_DA 
 _geom_hbond_angle_DHA 
 _geom_hbond_site_symmetry_A 
O3 H3 O1W  0.82 1.60 2.404(10) 166.3 . 
O1W H1W O3  0.85 1.82 2.596(5) 150.9 6_556 
O1W H2W O2  0.85 1.79 2.616(8) 164.7 5_657 
  
_diffrn_measured_fraction_theta_max    0.527 
_diffrn_reflns_theta_full              24.83 
_diffrn_measured_fraction_theta_full   0.527 
_refine_diff_density_max    0.633 
_refine_diff_density_min   -0.470 
_refine_diff_density_rms    0.129 

  
data_5_69gpa 
  
_audit_creation_method            SHELXL-97 
_chemical_name_systematic 
; 
 ? 
; 
_chemical_name_common             ? 
_chemical_melting_point           ? 
_chemical_formula_moiety          ? 
_chemical_formula_sum 
 'C4 H14 O8 P2 Zn' 
_chemical_formula_weight          317.46 
  
loop_ 
 _atom_type_symbol 
 _atom_type_description 
 _atom_type_scat_dispersion_real 
 _atom_type_scat_dispersion_imag 
 _atom_type_scat_source 
 'C'  'C'  -0.0020   0.0011 
 'WCROMER Program in WinGX L.Kissel & R.H.Pratt Acta Cryst A46 170 1990'
 'H'  'H'   0.0000   0.0000 
 'WCROMER Program in WinGX L.Kissel & R.H.Pratt Acta Cryst A46 170 1990'
 'O'  'O'  -0.0041   0.0043 
 'WCROMER Program in WinGX L.Kissel & R.H.Pratt Acta Cryst A46 170 1990'
 'P'  'P'   0.0660   0.0684 
 'WCROMER Program in WinGX L.Kissel & R.H.Pratt Acta Cryst A46 170 1990'
 'Zn'  'Zn'   0.3061   1.0799 
  'WCROMER Program in WinGX L.Kissel & R.H.Pratt Acta Cryst A46 170 1990' 
  
_symmetry_cell_setting            monoclinic 
_symmetry_space_group_name_H-M    'C 2/c' 
  
loop_ 
 _symmetry_equiv_pos_as_xyz 
 'x, y, z' 
 '-x, y, -z+1/2' 
 'x+1/2, y+1/2, z' 
 '-x+1/2, y+1/2, -z+1/2' 
 '-x, -y, -z' 
 'x, -y, z-1/2' 
 '-x+1/2, -y+1/2, -z' 
 'x+1/2, -y+1/2, z-1/2' 
  
_cell_length_a                    17.1996(18) 
_cell_length_b                    8.139(2) 
_cell_length_c                    7.4651(6) 
_cell_angle_alpha                 90.00 
_cell_angle_beta                  122.431(6) 
_cell_angle_gamma                 90.00 
_cell_volume                      882.0(3) 
_cell_formula_units_Z             4 
_cell_measurement_temperature     296(2) 
_cell_measurement_reflns_used     1275 
_cell_measurement_theta_min       3.7915 
_cell_measurement_theta_max       23.901 
  
_exptl_crystal_description        blade 
_exptl_crystal_colour             colorless 
_exptl_crystal_size_max           0.18 
_exptl_crystal_size_mid           0.06 
_exptl_crystal_size_min           0.04 
_exptl_crystal_density_meas       ? 
_exptl_crystal_density_diffrn     2.391 
_exptl_crystal_density_method     'not measured' 
_exptl_crystal_F_000              648 
_exptl_absorpt_coefficient_mu     2.034 
_exptl_absorpt_correction_type    multi-scan 
_exptl_absorpt_correction_T_min   0.7110 
_exptl_absorpt_correction_T_max   0.9231 
_exptl_absorpt_process_details    'SADABS 2008/1 Bruker AXS Madison WI USA' 
  
_exptl_special_details 
; 
 The sample crystal was loaded into a Merill-Bassett-type cell,
 equipped with Bohler-Almax cut diamonds set in tungsten carbide
 backing seats, impinging upon a tungsten gasket.
; 
  
_diffrn_ambient_temperature       296(2) 
_diffrn_radiation_wavelength      0.60480 
_diffrn_radiation_type            synchrotron 
_diffrn_radiation_source          'Advanced Light Source station 11.3.1' 
_diffrn_radiation_monochromator   'silicon 111' 
_diffrn_measurement_device_type   'Bruker APEX II CCD diffractometer' 
_diffrn_measurement_method        '\w and \f scans' 
_diffrn_detector_area_resol_mean  8.3 
_diffrn_reflns_number             6468 
_diffrn_reflns_av_R_equivalents   0.0638 
_diffrn_reflns_av_sigmaI/netI     0.0397 
_diffrn_reflns_limit_h_min        -24 
_diffrn_reflns_limit_h_max        24 
_diffrn_reflns_limit_k_min        -5 
_diffrn_reflns_limit_k_max        5 
_diffrn_reflns_limit_l_min        -10 
_diffrn_reflns_limit_l_max        10 
_diffrn_reflns_theta_min          3.79 
_diffrn_reflns_theta_max          25.54 
_reflns_number_total              693 
_reflns_number_gt                 549 
_reflns_threshold_expression      I>2sigma(I) 
  
_computing_data_collection        'Bruker APEX 2' 
_computing_cell_refinement        'Bruker SAINT v7.60a' 
_computing_data_reduction         'Bruker SAINT v7.60a' 
_computing_structure_solution     'Bruker SHELXTL' 
_computing_structure_refinement   'Bruker SHELXTL' 
_computing_molecular_graphics     'Bruker SHELXTL' 
_computing_publication_material   'Bruker SHELXTL & local programs' 
  
_refine_special_details 
; 
 Refinement of F^2^ against ALL reflections.  The weighted R-factor wR and 
 goodness of fit S are based on F^2^, conventional R-factors R are based 
 on F, with F set to zero for negative F^2^. The threshold expression of 
 F^2^ > 2sigma(F^2^) is used only for calculating R-factors(gt) etc. and is 
 not relevant to the choice of reflections for refinement.  R-factors based 
 on F^2^ are statistically about twice as large as those based on F, and R- 
 factors based on ALL data will be even larger. All non-hydrogen atoms were 
 refined anisotropically. Hydrogen atoms were place geometrically on the 
 carbon atoms and refined with a riding model. The Hydrogen atoms on the
 oxygen atoms were found in the difference map, their distances were 
 restrained at 0.85(1) for water and 0.82(2) for hydroxide and their 
 displacement parameters were riden on their respective oxygen.
; 
  
_refine_ls_structure_factor_coef  Fsqd 
_refine_ls_matrix_type            full 
_refine_ls_weighting_scheme       calc 
_refine_ls_weighting_details 
 'calc w=1/[\s^2^(Fo^2^)+(0.0852P)^2^+1.0177P] where P=(Fo^2^+2Fc^2^)/3' 
_atom_sites_solution_primary      direct 
_atom_sites_solution_secondary    difmap 
_atom_sites_solution_hydrogens    geom 
_refine_ls_hydrogen_treatment     constr 
_refine_ls_extinction_method      none 
_refine_ls_extinction_coef        ? 
_refine_ls_number_reflns          693 
_refine_ls_number_parameters      69 
_refine_ls_number_restraints      0 
_refine_ls_R_factor_all           0.0639 
_refine_ls_R_factor_gt            0.0435 
_refine_ls_wR_factor_ref          0.1370 
_refine_ls_wR_factor_gt           0.1130 
_refine_ls_goodness_of_fit_ref    1.118 
_refine_ls_restrained_S_all       1.118 
_refine_ls_shift/su_max           0.000 
_refine_ls_shift/su_mean          0.000 
  
loop_ 
 _atom_site_label 
 _atom_site_type_symbol 
 _atom_site_fract_x 
 _atom_site_fract_y 
 _atom_site_fract_z 
 _atom_site_U_iso_or_equiv 
 _atom_site_adp_type 
 _atom_site_occupancy 
 _atom_site_symmetry_multiplicity 
 _atom_site_calc_flag 
 _atom_site_refinement_flags 
 _atom_site_disorder_assembly 
 _atom_site_disorder_group 
Zn1 Zn 0.5000 0.5403(2) 0.7500 0.0285(7) Uani 1 2 d S . . 
P1 P 0.38203(8) 0.3030(3) 0.7986(2) 0.0308(10) Uani 1 1 d . . . 
O1 O 0.3890(2) 0.4176(10) 0.6514(6) 0.036(3) Uani 1 1 d . . . 
O1W O 0.4261(3) -0.0881(12) 0.9778(8) 0.058(3) Uani 1 1 d . . . 
H1W H 0.4088 -0.1489 1.0427 0.086 Uiso 1 1 d R . . 
H2W H 0.4634 -0.0118 1.0518 0.086 Uiso 1 1 d R . . 
O2 O 0.4699(2) 0.3106(8) 1.0201(5) 0.025(3) Uani 1 1 d . . . 
O3 O 0.3690(3) 0.1240(11) 0.7122(6) 0.042(3) Uani 1 1 d . . . 
H3 H 0.3902 0.0590 0.8115 0.063 Uiso 1 1 calc R . . 
C1 C 0.2847(3) 0.3388(14) 0.8126(8) 0.035(4) Uani 1 1 d . . . 
H1A H 0.2807 0.4547 0.8366 0.042 Uiso 1 1 calc R . . 
H1B H 0.2295 0.3083 0.6791 0.042 Uiso 1 1 calc R . . 
C2 C 0.2910(4) 0.2387(15) 0.9924(9) 0.041(4) Uani 1 1 d . . . 
H2A H 0.2971 0.1233 0.9698 0.049 Uiso 1 1 calc R . . 
H2B H 0.3458 0.2713 1.1255 0.049 Uiso 1 1 calc R . . 
  
loop_ 
 _atom_site_aniso_label 
 _atom_site_aniso_U_11 
 _atom_site_aniso_U_22 
 _atom_site_aniso_U_33 
 _atom_site_aniso_U_23 
 _atom_site_aniso_U_13 
 _atom_site_aniso_U_12 
Zn1 0.0303(4) 0.030(2) 0.0251(4) 0.000 0.0149(3) 0.000 
P1 0.0282(6) 0.037(3) 0.0244(6) 0.0018(8) 0.0124(5) -0.0014(6) 
O1 0.0378(19) 0.034(9) 0.0350(18) 0.008(3) 0.0179(15) -0.007(2) 
O1W 0.053(2) 0.066(12) 0.063(3) 0.017(4) 0.037(2) 0.008(3) 
O2 0.0310(17) 0.009(9) 0.0266(16) -0.010(2) 0.0093(14) 0.0016(17) 
O3 0.050(2) 0.041(11) 0.0288(17) -0.009(3) 0.0176(17) -0.005(3) 
C1 0.031(2) 0.045(12) 0.028(2) 0.002(3) 0.0149(19) -0.003(3) 
C2 0.038(3) 0.049(13) 0.040(3) 0.003(4) 0.023(2) -0.005(3) 
  
_geom_special_details 
; 
 All esds (except the esd in the dihedral angle between two l.s. planes) 
 are estimated using the full covariance matrix.  The cell esds are taken 
 into account individually in the estimation of esds in distances, angles 
 and torsion angles; correlations between esds in cell parameters are only 
 used when they are defined by crystal symmetry.  An approximate (isotropic) 
 treatment of cell esds is used for estimating esds involving l.s. planes. 
; 
  
loop_ 
 _geom_bond_atom_site_label_1 
 _geom_bond_atom_site_label_2 
 _geom_bond_distance 
 _geom_bond_site_symmetry_2 
 _geom_bond_publ_flag 
Zn1 O1 1.917(5) . ? 
Zn1 O1 1.917(5) 2_656 ? 
Zn1 O2 1.932(5) 5_667 ? 
Zn1 O2 1.932(5) 6_565 ? 
P1 O1 1.495(6) . ? 
P1 O2 1.530(3) . ? 
P1 O3 1.560(9) . ? 
P1 C1 1.756(5) . ? 
O1W H1W 0.8500 . ? 
O1W H2W 0.8499 . ? 
O2 Zn1 1.932(5) 5_667 ? 
O3 H3 0.8200 . ? 
C1 C2 1.523(10) . ? 
C1 H1A 0.9700 . ? 
C1 H1B 0.9700 . ? 
C2 C2 1.487(10) 7_557 ? 
C2 H2A 0.9700 . ? 
C2 H2B 0.9700 . ? 
  
loop_ 
 _geom_angle_atom_site_label_1 
 _geom_angle_atom_site_label_2 
 _geom_angle_atom_site_label_3 
 _geom_angle 
 _geom_angle_site_symmetry_1 
 _geom_angle_site_symmetry_3 
 _geom_angle_publ_flag 
O1 Zn1 O1 117.2(4) . 2_656 ? 
O1 Zn1 O2 113.95(19) . 5_667 ? 
O1 Zn1 O2 104.38(18) 2_656 5_667 ? 
O1 Zn1 O2 104.38(18) . 6_565 ? 
O1 Zn1 O2 113.95(19) 2_656 6_565 ? 
O2 Zn1 O2 102.2(4) 5_667 6_565 ? 
O1 P1 O2 110.3(3) . . ? 
O1 P1 O3 109.2(3) . . ? 
O2 P1 O3 108.9(3) . . ? 
O1 P1 C1 113.3(4) . . ? 
O2 P1 C1 110.4(2) . . ? 
O3 P1 C1 104.4(4) . . ? 
P1 O1 Zn1 119.9(2) . . ? 
H1W O1W H2W 115.4 . . ? 
P1 O2 Zn1 128.7(3) . 5_667 ? 
P1 O3 H3 109.5 . . ? 
C2 C1 P1 110.1(5) . . ? 
C2 C1 H1A 109.6 . . ? 
P1 C1 H1A 109.6 . . ? 
C2 C1 H1B 109.6 . . ? 
P1 C1 H1B 109.6 . . ? 
H1A C1 H1B 108.2 . . ? 
C2 C2 C1 112.3(9) 7_557 . ? 
C2 C2 H2A 109.1 7_557 . ? 
C1 C2 H2A 109.1 . . ? 
C2 C2 H2B 109.1 7_557 . ? 
C1 C2 H2B 109.1 . . ? 
H2A C2 H2B 107.9 . . ? 
  
loop_ 
 _geom_hbond_atom_site_label_D 
 _geom_hbond_atom_site_label_H 
 _geom_hbond_atom_site_label_A 
 _geom_hbond_distance_DH 
 _geom_hbond_distance_HA 
 _geom_hbond_distance_DA 
 _geom_hbond_angle_DHA 
 _geom_hbond_site_symmetry_A 
O3 H3 O1W  0.82 1.59 2.406(10) 171.4 . 
O1W H1W O3  0.85 1.74 2.441(6) 137.7 6_556 
O1W H1W O3  0.85 1.74 2.441(6) 137.7 6_556 
O1W H2W O1W  0.85 2.18 2.779(13) 127.0 5_657 
O1W H2W O3  0.85 2.61 3.019(6) 111.1 5_657 
O1W H2W O2  0.85 2.64 3.308(12) 136.1 . 
  
_diffrn_measured_fraction_theta_max    0.515 
_diffrn_reflns_theta_full              25.54 
_diffrn_measured_fraction_theta_full   0.515 
_refine_diff_density_max    0.650 
_refine_diff_density_min   -0.512 
_refine_diff_density_rms    0.130 

  
data_7_32gpa 
  
_audit_creation_method            SHELXL-97 
_chemical_name_systematic 
; 
 ? 
; 
_chemical_name_common             ? 
_chemical_melting_point           ? 
_chemical_formula_moiety          ? 
_chemical_formula_sum 
 'C4 H14 O8 P2 Zn' 
_chemical_formula_weight          317.46 
  
loop_ 
 _atom_type_symbol 
 _atom_type_description 
 _atom_type_scat_dispersion_real 
 _atom_type_scat_dispersion_imag 
 _atom_type_scat_source 
 'C'  'C'  -0.0020   0.0011 
 'WCROMER Program in WinGX L.Kissel & R.H.Pratt Acta Cryst A46 170 1990'
 'H'  'H'   0.0000   0.0000 
 'WCROMER Program in WinGX L.Kissel & R.H.Pratt Acta Cryst A46 170 1990'
 'O'  'O'  -0.0041   0.0043 
 'WCROMER Program in WinGX L.Kissel & R.H.Pratt Acta Cryst A46 170 1990'
 'P'  'P'   0.0660   0.0684 
 'WCROMER Program in WinGX L.Kissel & R.H.Pratt Acta Cryst A46 170 1990'
 'Zn'  'Zn'   0.3061   1.0799 
  'WCROMER Program in WinGX L.Kissel & R.H.Pratt Acta Cryst A46 170 1990' 
  
_symmetry_cell_setting            monoclinic 
_symmetry_space_group_name_H-M    'C 2/c' 
  
loop_ 
 _symmetry_equiv_pos_as_xyz 
 'x, y, z' 
 '-x, y, -z+1/2' 
 'x+1/2, y+1/2, z' 
 '-x+1/2, y+1/2, -z+1/2' 
 '-x, -y, -z' 
 'x, -y, z-1/2' 
 '-x+1/2, -y+1/2, -z' 
 'x+1/2, -y+1/2, z-1/2' 
  
_cell_length_a                    17.023(2) 
_cell_length_b                    8.066(3) 
_cell_length_c                    7.4078(8) 
_cell_angle_alpha                 90.00 
_cell_angle_beta                  123.227(8) 
_cell_angle_gamma                 90.00 
_cell_volume                      850.9(3) 
_cell_formula_units_Z             4 
_cell_measurement_temperature     296(2) 
_cell_measurement_reflns_used     831 
_cell_measurement_theta_min       2.426 
_cell_measurement_theta_max       19.0515 
  
_exptl_crystal_description        blade 
_exptl_crystal_colour             colorless 
_exptl_crystal_size_max           0.18 
_exptl_crystal_size_mid           0.06 
_exptl_crystal_size_min           0.04 
_exptl_crystal_density_meas       ? 
_exptl_crystal_density_diffrn     2.478 
_exptl_crystal_density_method     'not measured' 
_exptl_crystal_F_000              648 
_exptl_absorpt_coefficient_mu     2.108 
_exptl_absorpt_correction_type    multi-scan 
_exptl_absorpt_correction_T_min   0.7028 
_exptl_absorpt_correction_T_max   0.9204 
_exptl_absorpt_process_details    'SADABS 2008/1 Bruker AXS Madison WI USA' 
  
_exptl_special_details 
; 
 The sample crystal was loaded into a Merill-Bassett-type cell,
 equipped with Bohler-Almax cut diamonds set in tungsten carbide
 backing seats, impinging upon a tungsten gasket.
; 
  
_diffrn_ambient_temperature       296(2) 
_diffrn_radiation_wavelength      0.60480 
_diffrn_radiation_type            synchrotron 
_diffrn_radiation_source          'Advanced Light Source station 11.3.1' 
_diffrn_radiation_monochromator   'silicon 111' 
_diffrn_measurement_device_type   'Bruker APEX II CCD diffractometer' 
_diffrn_measurement_method        '\w and \f scans' 
_diffrn_detector_area_resol_mean  8.3 
_diffrn_reflns_number             6131 
_diffrn_reflns_av_R_equivalents   0.0630 
_diffrn_reflns_av_sigmaI/netI     0.0329 
_diffrn_reflns_limit_h_min        -24 
_diffrn_reflns_limit_h_max        23 
_diffrn_reflns_limit_k_min        -5 
_diffrn_reflns_limit_k_max        5 
_diffrn_reflns_limit_l_min        -10 
_diffrn_reflns_limit_l_max        10 
_diffrn_reflns_theta_min          2.43 
_diffrn_reflns_theta_max          25.64 
_reflns_number_total              547 
_reflns_number_gt                 427 
_reflns_threshold_expression      I>2\s(I) 
  
_computing_data_collection        'Bruker APEX 2' 
_computing_cell_refinement        'Bruker SAINT v7.60a' 
_computing_data_reduction         'Bruker SAINT v7.60a' 
_computing_structure_solution     'Bruker SHELXTL' 
_computing_structure_refinement   'Bruker SHELXTL' 
_computing_molecular_graphics     'Bruker SHELXTL' 
_computing_publication_material   'Bruker SHELXTL & local programs' 
  
_refine_special_details 
; 
 Refinement of F^2^ against ALL reflections.  The weighted R-factor wR and 
 goodness of fit S are based on F^2^, conventional R-factors R are based 
 on F, with F set to zero for negative F^2^. The threshold expression of 
 F^2^ > 2sigma(F^2^) is used only for calculating R-factors(gt) etc. and is 
 not relevant to the choice of reflections for refinement.  R-factors based 
 on F^2^ are statistically about twice as large as those based on F, and R- 
 factors based on ALL data will be even larger. All non-hydrogen atoms were 
 refined anisotropically. Hydrogen atoms were place geometrically on the 
 carbon atoms and refined with a riding model. The Hydrogen atoms on the
 oxygen atoms were found in the difference map, their distances were 
 restrained at 0.85(1) for water and 0.82(2) for hydroxide and their 
 displacement parameters were riden on their respective oxygen.
; 
  
_refine_ls_structure_factor_coef  Fsqd 
_refine_ls_matrix_type            full 
_refine_ls_weighting_scheme       calc 
_refine_ls_weighting_details 
 'calc w=1/[\s^2^(Fo^2^)+(0.1003P)^2^+1.3615P] where P=(Fo^2^+2Fc^2^)/3' 
_atom_sites_solution_primary      direct 
_atom_sites_solution_secondary    difmap 
_atom_sites_solution_hydrogens    geom 
_refine_ls_hydrogen_treatment     constr 
_refine_ls_extinction_method      none 
_refine_ls_extinction_coef        ? 
_refine_ls_number_reflns          547 
_refine_ls_number_parameters      69 
_refine_ls_number_restraints      0 
_refine_ls_R_factor_all           0.0742 
_refine_ls_R_factor_gt            0.0537 
_refine_ls_wR_factor_ref          0.1580 
_refine_ls_wR_factor_gt           0.1414 
_refine_ls_goodness_of_fit_ref    1.130 
_refine_ls_restrained_S_all       1.130 
_refine_ls_shift/su_max           0.000 
_refine_ls_shift/su_mean          0.000 
  
loop_ 
 _atom_site_label 
 _atom_site_type_symbol 
 _atom_site_fract_x 
 _atom_site_fract_y 
 _atom_site_fract_z 
 _atom_site_U_iso_or_equiv 
 _atom_site_adp_type 
 _atom_site_occupancy 
 _atom_site_symmetry_multiplicity 
 _atom_site_calc_flag 
 _atom_site_refinement_flags 
 _atom_site_disorder_assembly 
 _atom_site_disorder_group 
Zn1 Zn 0.5000 0.5379(3) 0.7500 0.0291(10) Uani 1 2 d S . . 
P1 P 0.38055(12) 0.3023(5) 0.7954(3) 0.0338(16) Uani 1 1 d . . . 
O1W O 0.4290(4) -0.0812(17) 0.9898(11) 0.063(5) Uani 1 1 d . . . 
H1W H 0.4172 -0.1104 1.0829 0.094 Uiso 1 1 d R . . 
H2W H 0.4734 -0.1398 1.0036 0.094 Uiso 1 1 d R . . 
O1 O 0.3877(3) 0.4108(15) 0.6435(8) 0.043(4) Uani 1 1 d . . . 
O2 O 0.4707(3) 0.3117(13) 1.0195(8) 0.038(4) Uani 1 1 d . . . 
O3 O 0.3657(4) 0.1198(17) 0.7109(9) 0.043(5) Uani 1 1 d . . . 
H3 H 0.3893 0.0556 0.8136 0.065 Uiso 1 1 calc R . . 
C1 C 0.2834(4) 0.343(2) 0.8089(11) 0.044(6) Uani 1 1 d . . . 
H1A H 0.2808 0.4606 0.8337 0.053 Uiso 1 1 calc R . . 
H1B H 0.2262 0.3133 0.6737 0.053 Uiso 1 1 calc R . . 
C2 C 0.2922(5) 0.241(2) 0.9963(13) 0.050(6) Uani 1 1 d . . . 
H2A H 0.3010 0.1248 0.9775 0.060 Uiso 1 1 calc R . . 
H2B H 0.3469 0.2778 1.1322 0.060 Uiso 1 1 calc R . . 
  
loop_ 
 _atom_site_aniso_label 
 _atom_site_aniso_U_11 
 _atom_site_aniso_U_22 
 _atom_site_aniso_U_33 
 _atom_site_aniso_U_23 
 _atom_site_aniso_U_13 
 _atom_site_aniso_U_12 
Zn1 0.0357(6) 0.017(3) 0.0321(6) 0.000 0.0169(5) 0.000 
P1 0.0330(9) 0.031(5) 0.0303(9) 0.0007(14) 0.0127(8) -0.0017(10) 
O1W 0.057(3) 0.070(17) 0.070(4) 0.017(6) 0.040(3) 0.014(4) 
O1 0.042(3) 0.044(14) 0.040(3) 0.008(4) 0.020(2) -0.009(3) 
O2 0.034(2) 0.035(15) 0.034(2) -0.008(4) 0.012(2) 0.001(3) 
O3 0.062(4) 0.018(17) 0.037(3) -0.001(5) 0.019(3) -0.005(4) 
C1 0.033(3) 0.066(19) 0.030(3) 0.004(5) 0.014(3) -0.004(4) 
C2 0.043(4) 0.06(2) 0.049(4) 0.012(6) 0.028(4) 0.008(5) 
  
_geom_special_details 
; 
 All esds (except the esd in the dihedral angle between two l.s. planes) 
 are estimated using the full covariance matrix.  The cell esds are taken 
 into account individually in the estimation of esds in distances, angles 
 and torsion angles; correlations between esds in cell parameters are only 
 used when they are defined by crystal symmetry.  An approximate (isotropic) 
 treatment of cell esds is used for estimating esds involving l.s. planes. 
; 
  
loop_ 
 _geom_bond_atom_site_label_1 
 _geom_bond_atom_site_label_2 
 _geom_bond_distance 
 _geom_bond_site_symmetry_2 
 _geom_bond_publ_flag 
Zn1 O1 1.917(7) 2_656 ? 
Zn1 O1 1.917(7) . ? 
Zn1 O2 1.924(8) 5_667 ? 
Zn1 O2 1.924(8) 6_565 ? 
P1 O1 1.482(8) . ? 
P1 O2 1.525(5) . ? 
P1 O3 1.565(13) . ? 
P1 C1 1.741(8) . ? 
O1W H1W 0.8500 . ? 
O1W H2W 0.8501 . ? 
O2 Zn1 1.924(8) 5_667 ? 
O3 H3 0.8200 . ? 
C1 C2 1.551(13) . ? 
C1 H1A 0.9700 . ? 
C1 H1B 0.9700 . ? 
C2 C2 1.474(13) 7_557 ? 
C2 H2A 0.9700 . ? 
C2 H2B 0.9700 . ? 
  
loop_ 
 _geom_angle_atom_site_label_1 
 _geom_angle_atom_site_label_2 
 _geom_angle_atom_site_label_3 
 _geom_angle 
 _geom_angle_site_symmetry_1 
 _geom_angle_site_symmetry_3 
 _geom_angle_publ_flag 
O1 Zn1 O1 115.3(7) 2_656 . ? 
O1 Zn1 O2 104.9(3) 2_656 5_667 ? 
O1 Zn1 O2 114.7(3) . 5_667 ? 
O1 Zn1 O2 114.7(3) 2_656 6_565 ? 
O1 Zn1 O2 104.9(3) . 6_565 ? 
O2 Zn1 O2 101.9(5) 5_667 6_565 ? 
O1 P1 O2 110.1(4) . . ? 
O1 P1 O3 108.3(5) . . ? 
O2 P1 O3 109.1(5) . . ? 
O1 P1 C1 114.0(5) . . ? 
O2 P1 C1 110.4(3) . . ? 
O3 P1 C1 104.5(6) . . ? 
H1W O1W H2W 109.8 . . ? 
P1 O1 Zn1 118.8(3) . . ? 
P1 O2 Zn1 127.9(5) . 5_667 ? 
P1 O3 H3 109.5 . . ? 
C2 C1 P1 108.8(7) . . ? 
C2 C1 H1A 109.9 . . ? 
P1 C1 H1A 109.9 . . ? 
C2 C1 H1B 109.9 . . ? 
P1 C1 H1B 109.9 . . ? 
H1A C1 H1B 108.3 . . ? 
C2 C2 C1 111.2(11) 7_557 . ? 
C2 C2 H2A 109.4 7_557 . ? 
C1 C2 H2A 109.4 . . ? 
C2 C2 H2B 109.4 7_557 . ? 
C1 C2 H2B 109.4 . . ? 
H2A C2 H2B 108.0 . . ? 
  
loop_ 
 _geom_hbond_atom_site_label_D 
 _geom_hbond_atom_site_label_H 
 _geom_hbond_atom_site_label_A 
 _geom_hbond_distance_DH 
 _geom_hbond_distance_HA 
 _geom_hbond_distance_DA 
 _geom_hbond_angle_DHA 
 _geom_hbond_site_symmetry_A 
O3 H3 O1W  0.82 1.55 2.370(15) 173.8 . 
O1W H1W O3  0.85 1.61 2.423(9) 159.9 6_556 
O1W H1W O1  0.85 2.56 3.119(17) 124.0 6_556 
O1W H2W O2  0.85 1.74 2.551(13) 158.3 5_657 
O1W H2W O3  0.85 2.38 2.956(9) 125.8 5_657 
  
_diffrn_measured_fraction_theta_max    0.414 
_diffrn_reflns_theta_full              25.64 
_diffrn_measured_fraction_theta_full   0.414 
_refine_diff_density_max    0.584 
_refine_diff_density_min   -0.344 
_refine_diff_density_rms    0.127 
 
data_AmbientPostCompression 
  
_audit_creation_method            SHELXL-97 
_chemical_name_systematic 
; 
 ? 
; 
_chemical_name_common             ? 
_chemical_melting_point           ? 
_chemical_formula_moiety          ? 
_chemical_formula_sum 
 'C4 H14 O8 P2 Zn' 
_chemical_formula_weight          317.46 
  
loop_ 
 _atom_type_symbol 
 _atom_type_description 
 _atom_type_scat_dispersion_real 
 _atom_type_scat_dispersion_imag 
 _atom_type_scat_source 
 'C'  'C'  -0.0020   0.0011 
 'WCROMER Program in WinGX L.Kissel & R.H.Pratt Acta Cryst A46 170 1990'
 'H'  'H'   0.0000   0.0000 
 'WCROMER Program in WinGX L.Kissel & R.H.Pratt Acta Cryst A46 170 1990'
 'O'  'O'  -0.0041   0.0043 
 'WCROMER Program in WinGX L.Kissel & R.H.Pratt Acta Cryst A46 170 1990'
 'P'  'P'   0.0660   0.0684 
 'WCROMER Program in WinGX L.Kissel & R.H.Pratt Acta Cryst A46 170 1990'
 'Zn'  'Zn'   0.3061   1.0799 
  'WCROMER Program in WinGX L.Kissel & R.H.Pratt Acta Cryst A46 170 1990'
  
_symmetry_cell_setting            monoclinic 
_symmetry_space_group_name_H-M    'C 2/c' 
  
loop_ 
 _symmetry_equiv_pos_as_xyz 
 'x, y, z' 
 '-x, y, -z+1/2' 
 'x+1/2, y+1/2, z' 
 '-x+1/2, y+1/2, -z+1/2' 
 '-x, -y, -z' 
 'x, -y, z-1/2' 
 '-x+1/2, -y+1/2, -z' 
 'x+1/2, -y+1/2, z-1/2' 
  
_cell_length_a                    18.552(12) 
_cell_length_b                    8.272(5) 
_cell_length_c                    8.261(5) 
_cell_angle_alpha                 90.00 
_cell_angle_beta                  113.790(6) 
_cell_angle_gamma                 90.00 
_cell_volume                      1160.1(13) 
_cell_formula_units_Z             4 
_cell_measurement_temperature     296(2) 
_cell_measurement_reflns_used     1255 
_cell_measurement_theta_min       5.13 
_cell_measurement_theta_max       24.688 
  
_exptl_crystal_description        blade 
_exptl_crystal_colour             colorless 
_exptl_crystal_size_max           0.18 
_exptl_crystal_size_mid           0.06 
_exptl_crystal_size_min           0.04 
_exptl_crystal_density_meas       ? 
_exptl_crystal_density_diffrn     1.818 
_exptl_crystal_density_method     'not measured' 
_exptl_crystal_F_000              648 
_exptl_absorpt_coefficient_mu     1.546 
_exptl_absorpt_correction_type    multi-scan 
_exptl_absorpt_correction_T_min   0.7683 
_exptl_absorpt_correction_T_max   0.9407 
_exptl_absorpt_process_details    'SADABS 2008/1 Bruker AXS Madison WI USA' 
  
_exptl_special_details 
; 
  The sample crystal had previously been loaded into a Merill-Bassett-type cell
, equipped with Bohler-Almax cut diamonds set in tungsten carbide backing seats
,impinging upon a tungsten gasket.
; 
  
_diffrn_ambient_temperature       296(2) 
_diffrn_radiation_wavelength      0.60480 
_diffrn_radiation_type            synchrotron 
_diffrn_radiation_source          'Advanced Light Source station 11.3.1' 
_diffrn_radiation_monochromator   'silicon 111' 
_diffrn_measurement_device_type   'Bruker APEX II CCD diffractometer' 
_diffrn_measurement_method        '\w and \f scans'
_diffrn_detector_area_resol_mean  8.3 
_diffrn_reflns_number             4557 
_diffrn_reflns_av_R_equivalents   0.0619 
_diffrn_reflns_av_sigmaI/netI     0.0535 
_diffrn_reflns_limit_h_min        -15 
_diffrn_reflns_limit_h_max        26 
_diffrn_reflns_limit_k_min        -11 
_diffrn_reflns_limit_k_max        11 
_diffrn_reflns_limit_l_min        -11 
_diffrn_reflns_limit_l_max        11 
_diffrn_reflns_theta_min          5.13 
_diffrn_reflns_theta_max          25.58 
_reflns_number_total              1713 
_reflns_number_gt                 1431 
_reflns_threshold_expression      I>2sigma(I) 
  
_computing_data_collection        'Bruker APEX 2' 
_computing_cell_refinement        'Bruker SAINT v7.60a' 
_computing_data_reduction         'Bruker SAINT v7.60a' 
_computing_structure_solution     'Bruker SHELXTL' 
_computing_structure_refinement   'Bruker SHELXTL' 
_computing_molecular_graphics     'Bruker SHELXTL' 
_computing_publication_material   'Bruker SHELXTL & local programs' 
  
_refine_special_details 
; 
 Refinement of F^2^ against ALL reflections.  The weighted R-factor wR and 
 goodness of fit S are based on F^2^, conventional R-factors R are based 
 on F, with F set to zero for negative F^2^. The threshold expression of 
 F^2^ > 2sigma(F^2^) is used only for calculating R-factors(gt) etc. and is 
 not relevant to the choice of reflections for refinement.  R-factors based 
 on F^2^ are statistically about twice as large as those based on F, and R- 
 factors based on ALL data will be even larger. All non-hydrogen atoms were
 refined anisotropically. Hydrogen atoms were place geometrically on the 
 carbon atoms and refined with a riding model. The Hydrogen atoms on the
 oxygen atoms were found in the difference map, their distances were 
 restrained at 0.85(1) for water and 0.82(2) for hydroxide and their 
 displacement parameters were riden on their respective oxygen.
; 
  
_refine_ls_structure_factor_coef  Fsqd 
_refine_ls_matrix_type            full 
_refine_ls_weighting_scheme       calc 
_refine_ls_weighting_details 
 'calc w=1/[\s^2^(Fo^2^)+(0.0641P)^2^+0.0000P] where P=(Fo^2^+2Fc^2^)/3' 
_atom_sites_solution_primary      direct 
_atom_sites_solution_secondary    difmap 
_atom_sites_solution_hydrogens    geom 
_refine_ls_hydrogen_treatment     constr
_refine_ls_extinction_method      none 
_refine_ls_extinction_coef        ? 
_refine_ls_number_reflns          1713 
_refine_ls_number_parameters      69 
_refine_ls_number_restraints      2 
_refine_ls_R_factor_all           0.0495 
_refine_ls_R_factor_gt            0.0411 
_refine_ls_wR_factor_ref          0.1136 
_refine_ls_wR_factor_gt           0.1076 
_refine_ls_goodness_of_fit_ref    1.038 
_refine_ls_restrained_S_all       1.039 
_refine_ls_shift/su_max           0.001 
_refine_ls_shift/su_mean          0.000 
  
loop_ 
 _atom_site_label 
 _atom_site_type_symbol 
 _atom_site_fract_x 
 _atom_site_fract_y 
 _atom_site_fract_z 
 _atom_site_U_iso_or_equiv 
 _atom_site_adp_type 
 _atom_site_occupancy 
 _atom_site_symmetry_multiplicity 
 _atom_site_calc_flag 
 _atom_site_refinement_flags 
 _atom_site_disorder_assembly 
 _atom_site_disorder_group 
Zn1 Zn 0.5000 0.55861(4) 0.7500 0.03123(16) Uani 1 2 d S . . 
P2 P 0.39860(4) 0.31295(8) 0.85978(9) 0.03457(18) Uani 1 1 d . . . 
O1 O 0.41042(13) 0.4331(2) 0.7372(3) 0.0466(5) Uani 1 1 d . . . 
O2 O 0.46470(12) 0.3042(2) 1.0420(3) 0.0384(4) Uani 1 1 d . . . 
O3 O 0.39160(14) 0.1435(2) 0.7694(3) 0.0485(5) Uani 1 1 d . . . 
H3 H 0.3912 0.0724 0.8382 0.073 Uiso 1 1 calc R . . 
C2 C 0.28860(18) 0.2309(4) 0.9941(4) 0.0481(7) Uani 1 1 d . . . 
H2A H 0.2862 0.1229 0.9465 0.058 Uiso 1 1 calc R . . 
H2B H 0.3305 0.2327 1.1118 0.058 Uiso 1 1 calc R . . 
C1 C 0.30768(17) 0.3520(3) 0.8763(4) 0.0437(6) Uani 1 1 d . . . 
H1A H 0.3092 0.4599 0.9235 0.052 Uiso 1 1 calc R . . 
H1B H 0.2657 0.3494 0.7587 0.052 Uiso 1 1 calc R . . 
O1W O 0.40458(16) -0.1184(3) 0.9417(3) 0.0585(6) Uani 1 1 d D . . 
H1W H 0.4005 -0.1102 1.0402 0.088 Uiso 1 1 d RD . . 
H2W H 0.4514 -0.1427 0.9567 0.088 Uiso 1 1 d RD . . 
  
loop_ 
 _atom_site_aniso_label 
 _atom_site_aniso_U_11 
 _atom_site_aniso_U_22 
 _atom_site_aniso_U_33 
 _atom_site_aniso_U_23 
 _atom_site_aniso_U_13 
 _atom_site_aniso_U_12 
Zn1 0.0375(2) 0.0331(2) 0.0297(2) 0.000 0.02037(18) 0.000 
P2 0.0388(4) 0.0380(3) 0.0324(4) -0.0010(2) 0.0201(3) -0.0057(2) 
O1 0.0461(11) 0.0535(11) 0.0448(12) 0.0089(9) 0.0232(9) -0.0122(8) 
O2 0.0434(10) 0.0397(8) 0.0340(10) -0.0040(7) 0.0176(8) 0.0030(7) 
O3 0.0689(14) 0.0446(9) 0.0388(11) -0.0067(8) 0.0289(10) -0.0092(9) 
C2 0.0439(15) 0.0562(15) 0.0533(19) 0.0093(13) 0.0291(14) -0.0008(13) 
C1 0.0397(14) 0.0513(13) 0.0457(16) 0.0076(12) 0.0231(12) -0.0008(12) 
O1W 0.0714(16) 0.0583(12) 0.0547(15) 0.0107(11) 0.0348(12) 0.0186(12) 
  
_geom_special_details 
; 
 All esds (except the esd in the dihedral angle between two l.s. planes) 
 are estimated using the full covariance matrix.  The cell esds are taken 
 into account individually in the estimation of esds in distances, angles 
 and torsion angles; correlations between esds in cell parameters are only 
 used when they are defined by crystal symmetry.  An approximate (isotropic) 
 treatment of cell esds is used for estimating esds involving l.s. planes. 
; 
  
loop_ 
 _geom_bond_atom_site_label_1 
 _geom_bond_atom_site_label_2 
 _geom_bond_distance 
 _geom_bond_site_symmetry_2 
 _geom_bond_publ_flag 
Zn1 O1 1.926(2) 2_656 ? 
Zn1 O1 1.926(2) . ? 
Zn1 O2 1.939(2) 5_667 ? 
Zn1 O2 1.939(2) 6_565 ? 
P2 O1 1.497(2) . ? 
P2 O2 1.512(2) . ? 
P2 O3 1.569(2) . ? 
P2 C1 1.776(3) . ? 
O2 Zn1 1.939(2) 5_667 ? 
O3 H3 0.8200 . ? 
C2 C2 1.508(6) 7_557 ? 
C2 C1 1.534(4) . ? 
C2 H2A 0.9700 . ? 
C2 H2B 0.9700 . ? 
C1 H1A 0.9700 . ? 
C1 H1B 0.9700 . ? 
O1W H1W 0.8500 . ? 
O1W H2W 0.8500 . ? 
  
loop_ 
 _geom_angle_atom_site_label_1 
 _geom_angle_atom_site_label_2 
 _geom_angle_atom_site_label_3 
 _geom_angle 
 _geom_angle_site_symmetry_1 
 _geom_angle_site_symmetry_3 
 _geom_angle_publ_flag 
O1 Zn1 O1 114.77(14) 2_656 . ? 
O1 Zn1 O2 106.92(9) 2_656 5_667 ? 
O1 Zn1 O2 109.85(9) . 5_667 ? 
O1 Zn1 O2 109.86(9) 2_656 6_565 ? 
O1 Zn1 O2 106.92(9) . 6_565 ? 
O2 Zn1 O2 108.39(12) 5_667 6_565 ? 
O1 P2 O2 115.08(12) . . ? 
O1 P2 O3 106.14(13) . . ? 
O2 P2 O3 108.03(12) . . ? 
O1 P2 C1 109.51(14) . . ? 
O2 P2 C1 110.26(14) . . ? 
O3 P2 C1 107.48(14) . . ? 
P2 O1 Zn1 132.79(15) . . ? 
P2 O2 Zn1 134.65(11) . 5_667 ? 
P2 O3 H3 109.5 . . ? 
C2 C2 C1 111.9(3) 7_557 . ? 
C2 C2 H2A 109.2 7_557 . ? 
C1 C2 H2A 109.2 . . ? 
C2 C2 H2B 109.2 7_557 . ? 
C1 C2 H2B 109.2 . . ? 
H2A C2 H2B 107.9 . . ? 
C2 C1 P2 113.5(2) . . ? 
C2 C1 H1A 108.9 . . ? 
P2 C1 H1A 108.9 . . ? 
C2 C1 H1B 108.9 . . ? 
P2 C1 H1B 108.9 . . ? 
H1A C1 H1B 107.7 . . ? 
H1W O1W H2W 111.0 . . ? 
  
loop_ 
 _geom_hbond_atom_site_label_D 
 _geom_hbond_atom_site_label_H 
 _geom_hbond_atom_site_label_A 
 _geom_hbond_distance_DH 
 _geom_hbond_distance_HA 
 _geom_hbond_distance_DA 
 _geom_hbond_angle_DHA 
 _geom_hbond_site_symmetry_A 
O1W H1W O3  0.85 1.99 2.821(3) 167.4 6_556 
O3 H3 O1W  0.82 1.76 2.550(3) 159.8 . 
O1W H2W O2  0.85 2.05 2.828(3) 152.1 5_657 
  
_diffrn_measured_fraction_theta_max    0.967 
_diffrn_reflns_theta_full              25.58 
_diffrn_measured_fraction_theta_full   0.967 
_refine_diff_density_max    0.533 
_refine_diff_density_min   -1.292 
_refine_diff_density_rms    0.100 

_vrf_REFLT03_1_65GPa
;
PROBLEM: Reflection count < 85% complete (theta max?)
RESPONSE: High pressure data collections employ a diamond anvil cell
(DAC)which limits the maximum acheivable percentage of data collected. 
;
_vrf_PLAT029_1_65GPa
;
PROBLEM: _diffrn_measured_fraction_theta_full Low .......      0.507      
RESPONSE: High pressure data collections employ a diamond anvil cell
(DAC)which limits the maximum acheivable percentage of data collected.
;
_vrf_REFLT03_2_81GPa
;
PROBLEM: Reflection count < 85% complete (theta max?)
RESPONSE: High pressure data collections employ a diamond anvil cell
(DAC)which limits the maximum acheivable percentage of data collected.
;
_vrf_PLAT029_2_81GPa
;
PROBLEM: _diffrn_measured_fraction_theta_full Low .......      0.527      
RESPONSE: High pressure data collections employ a diamond anvil cell
(DAC)which limits the maximum acheivable percentage of data collected.
;
_vrf_REFLT03_5_69gpa
;
PROBLEM: Reflection count < 85% complete (theta max?)
RESPONSE: High pressure data collections employ a diamond anvil cell
(DAC)which limits the maximum acheivable percentage of data collected.
;
_vrf_PLAT029_5_69gpa
;
PROBLEM: _diffrn_measured_fraction_theta_full Low .......      0.515      
RESPONSE: High pressure data collections employ a diamond anvil cell
(DAC)which limits the maximum acheivable percentage of data collected.
;
_vrf_PLAT417_5_69gpa
;
PROBLEM: Short Inter D-H..H-D       H2W    ..  H3      ..       1.65 Ang. 
RESPONSE:  At high pressure, hydrogen bond distances can decrease
;
_vrf_REFLT03_7_32gpa
;
PROBLEM: Reflection count < 85% complete (theta max?)
RESPONSE: High pressure data collections employ a diamond anvil cell
(DAC)which limits the maximum acheivable percentage of data collected.
;
_vrf_PLAT029_7_32gpa
;
PROBLEM: _diffrn_measured_fraction_theta_full Low .......      0.414      
RESPONSE: High pressure data collections employ a diamond anvil cell
(DAC)which limits the maximum acheivable percentage of data collected.
;
# end Validation Reply Form
